# Supplementary material for: Biogas dry reforming for syngas production: catalytic performance of nickel supported on waste-derived SiO2
Source: Royal Society of Chemistry journal article supplement (doi:10.1039/c4cy01126k), 2014-09-23
Supplement: c4cy01126k1.pdf [file c4cy01126k1.pdf]

### Supporting Information

Table S1 The BET and porosity results of supports, fresh catalysts, and spent catalysts.

|         | Ni/SiO <sub>2</sub> -H                  |                            |           | Ni/SBA-15                               |                            |           | Ni/SiO <sub>2</sub> -P                  |                            |           |
|---------|-----------------------------------------|----------------------------|-----------|-----------------------------------------|----------------------------|-----------|-----------------------------------------|----------------------------|-----------|
|         | S <sub>BET</sub><br>(m <sup>2</sup> /g) | PV<br>(cm <sup>3</sup> /g) | PS<br>(Å) | S <sub>BET</sub><br>(m <sup>2</sup> /g) | PV<br>(cm <sup>3</sup> /g) | PS<br>(Å) | S <sub>BET</sub><br>(m <sup>2</sup> /g) | PV<br>(cm <sup>3</sup> /g) | PS<br>(Å) |
| Support | 243                                     | 0.63                       | 105       | 434                                     | 0.49                       | 42        | 337                                     | 1.28                       | 152       |
| Fresh   | 153                                     | 0.40                       | 107       | 332                                     | 0.42                       | 50        | 279                                     | 0.88                       | 126       |
| Spent   | 71                                      | 0.24                       | 134       | 250                                     | 0.35                       | 56        | 56                                      | 0.38                       | 270       |

Notes: PV refers to pore volume and PS refers to average pore size.

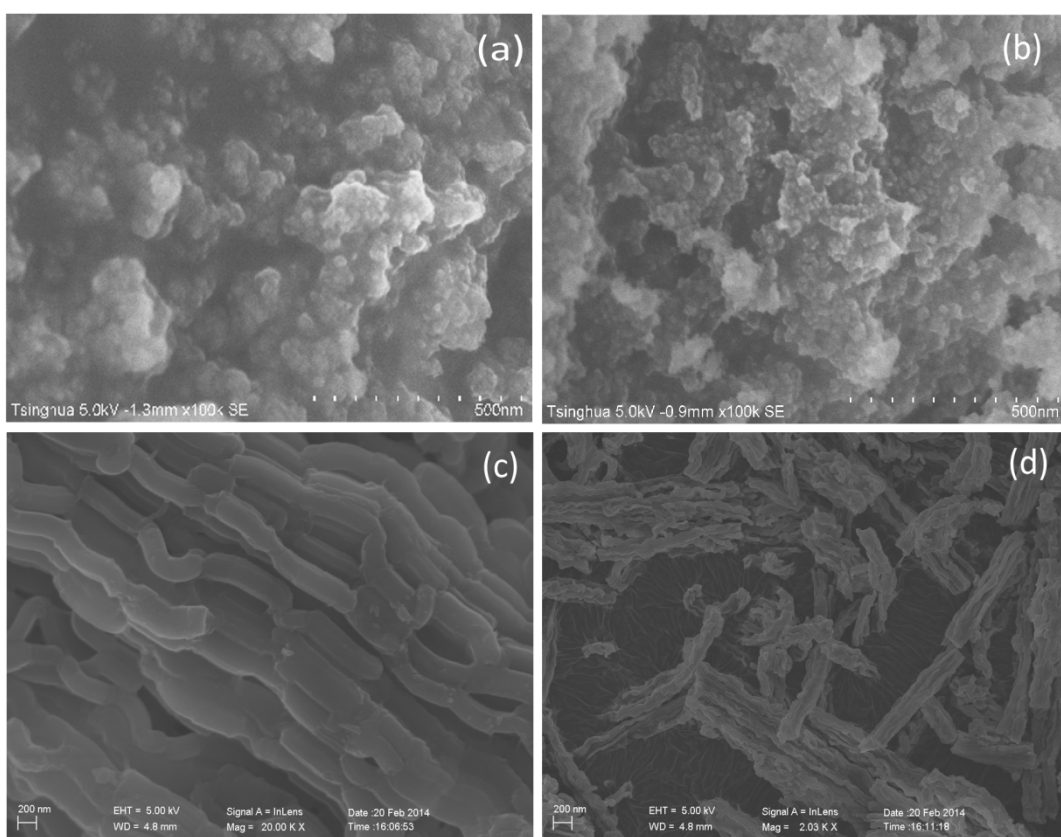

**Figure S1.** SEM images of catalyst supports: (a) SiO<sub>2</sub>-H, (b) SiO<sub>2</sub>-P, (c) and (d) SBA-15.

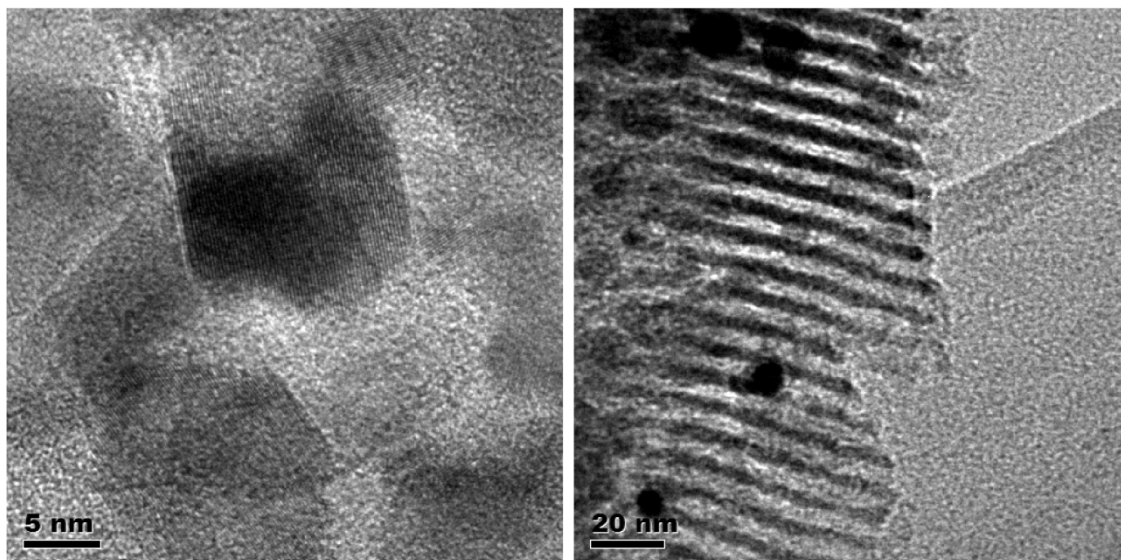

Figure S2 HR-TEM images of fresh catalysts: (left) Ni/SiO<sub>2</sub>-H and (right) Ni/SBA-15.

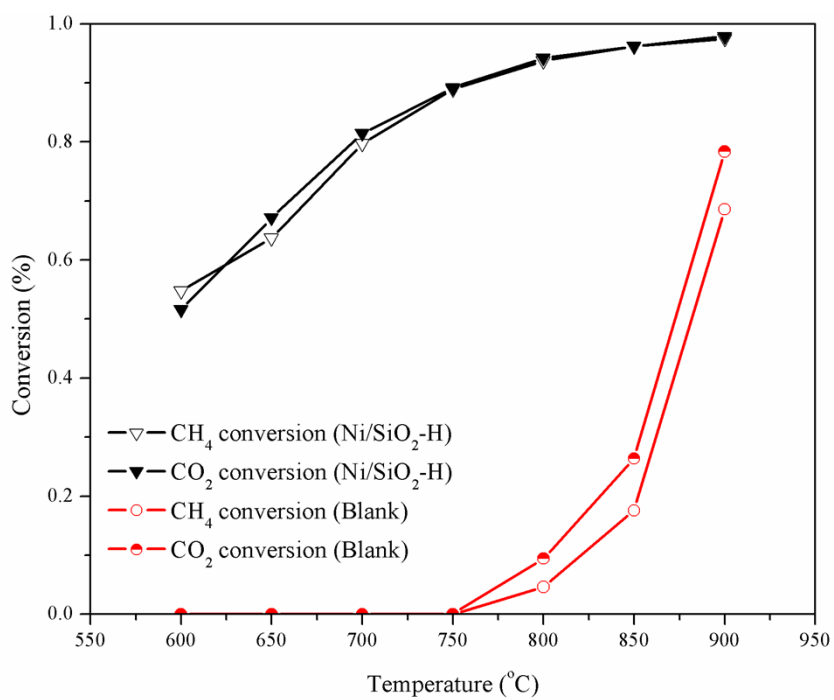

Figure S3. Compare of blank tests with Ni/SiO<sub>2</sub>-H catalyst at various temperatures.
